# Association of Adenovirus 36 Infection with Obesity and Metabolic Markers in Humans: A Meta-Analysis of Observational Studies

Tomohide Yamada, Kazuo Hara\*, Takashi Kadowaki

Department of Diabetes and Metabolic Diseases, Graduate School of Medicine, University of Tokyo, Japan

## Abstract

**Background:** Several studies have shown that Adenovirus 36 (Ad36) influences the risk of obesity in humans. Clarifying the relationship between Ad36 infection and obesity could lead to more effective approaches for the management of obesity. The objective of this study was to conduct a meta-analysis to confirm the influence of Ad36 infection on obesity and metabolic markers.

**Methodology/Principal Findings:** We searched MEDLINE and the Cochrane Library for pertinent articles (including their references) published between 1951 and April 22, 2012. Only English language reports of original observational studies were included in this meta-analysis. Data extraction was performed independently by two reviewers. Weighted mean differences (WMDs) and pooled odds ratios (ORs) with 95% confidence intervals (95% CIs) were calculated using the random effects model. Of 237 potentially relevant studies, 10 cross-sectional studies ( $n = 2,870$ ) conformed to the selection criteria. Pooled analysis showed that the WMD for BMI of Ad36 infection compared with non-infection was 3.19 (95% CI 1.44–4.93;  $P < 0.001$ ). Sensitivity analysis restricted to studies of adults yielded a similar result of 3.18 (95% CI 0.78–5.57;  $P = 0.009$ ). The increased risk of obesity associated with Ad36 infection was also significant (OR: 1.9; 95% CI: 1.01–3.56;  $P = 0.047$ ). No significant differences were found in relation to total cholesterol ( $P = 0.83$ ), triglycerides ( $P = 0.64$ ), HDL ( $P = 0.69$ ), blood glucose ( $P = 0.08$ ), waist circumference ( $P = 0.09$ ), and systolic blood pressure ( $P = 0.25$ ).

**Conclusion/Significance:** Ad36 infection was associated with the risk of obesity and weight gain, but was not associated with abnormal metabolic markers including waist circumference. It suggests that Ad36 infection is more associated with accumulation of subcutaneous fat than that of visceral fat. The relationship between Ad36 and obesity should be assessed by further studies, including well-designed prospective studies, to gain a better understanding of whether Ad36 plays a role in the etiology of human obesity.

**Citation:** Yamada T, Hara K, Kadowaki T (2012) Association of Adenovirus 36 Infection with Obesity and Metabolic Markers in Humans: A Meta-Analysis of Observational Studies. PLoS ONE 7(7): e42031. doi:10.1371/journal.pone.0042031

**Editor:** Giovanni Targher, University of Verona, Ospedale Civile Maggiore, Italy

**Received:** April 27, 2012; **Accepted:** June 29, 2012; **Published:** July 25, 2012

**Copyright:** © 2012 Yamada et al. This is an open-access article distributed under the terms of the Creative Commons Attribution License, which permits unrestricted use, distribution, and reproduction in any medium, provided the original author and source are credited.

**Funding:** The authors have no support or funding to report.

**Competing Interests:** The authors have declared that no competing interests exist.

\* E-mail: thara-ty@umin.ac.jp

## Introduction

Obesity has rapidly become a worldwide epidemic, with one billion people being either overweight or obese around the world [1]. Obesity is a major risk factor for many serious disorders, such as diabetes, cardiovascular disease, and cancer [2]. A number of large-scale epidemiologic studies have evaluated the relationship between obesity and mortality [3,4], revealing that a high body mass index (BMI) is associated with an increased rate of death from all causes and from cardiovascular disease. Most management strategies for obesity target the behavioral component of this disorder (e.g., by lifestyle modification), but are minimally effective. Thus, new therapeutic strategies are required.

Several recent studies have shown that Adenovirus 36 (Ad36) is associated with the risk of obesity and weight gain in humans [5–14]. These studies have generally found a positive association of Ad36 infection with obesity, although its magnitude has varied. Clarifying the relationship between Ad36 infection and obesity could lead to more effective approaches for the management of

this condition. Accordingly, we performed a meta-analysis to confirm the influence of Ad36 infection on obesity and metabolic markers.

## Methods

### Searches

The Medline and Cochrane Library electronic databases were searched from 1951 until April 22, 2012 using the medical subject headings (MeSH) “Adenovirus 36” and “Obesity” to identify observational studies that tested the association between Ad36 and obesity, BMI, and other metabolic markers in humans. Reference lists of the pertinent articles were also reviewed.

### Selection

We performed initial screening of study titles or abstracts, while the second screening was based on full-text review. Cohort studies, case-control studies, and cross-sectional studies evaluating the

relation of obesity to Ad36 infection were considered eligible for inclusion if the following criteria were fulfilled: 1) the full text of report was published in English; 2) event numbers in each exposure category were reported; 3) the presence of Ad36 infection was reported; and 4) obesity events and/or BMI and other metabolic markers were reported.

### Assessment of Validity

To ascertain the validity of the eligible studies, the quality of each report was appraised with reference to the STROBE statement [15].

### Data Extraction

Two independent investigators (T.Y. and K.H.) reviewed each study to determine its eligibility and then extracted and tabulated all of the relevant data. Disagreement was resolved by consensus between the two reviewers.

The following information was obtained from each study: first author, year of publication, type of subjects, country, parameters (obesity, BMI, triglycerides (TG), total cholesterol (TC), low-density lipoprotein (LDL), high-density lipoprotein (HDL), blood glucose (BG), systolic blood pressure (SBP), waist circumference (WC)), assessment of obesity, number of subjects, mean age, proportion of females, mean BMI, participants, and prevalence of Ad36 infection. Numerical data from the reports were used, and other data required for analysis (e.g., the mean  $\pm$  SD for the Ad36-positive and Ad36-negative groups) were calculated from the numerical data. The authors of the studies were contacted if necessary to obtain further details.

### Quantitative Synthesis of Data

The weighted mean difference (WMD) and pooled odds ratio (OR) were calculated to evaluate the association of Ad36 with obesity, BMI, and other metabolic markers across the studies by DerSimonian-Laird random effects meta-analysis. We also performed sensitivity analyses restricted to studies of adults, studies of children, and studies performed in the USA, in the EU, or in Asia. Univariate and multivariate meta-regression analyses were performed to explore sources of heterogeneity. Variables such as the type of subject (adults or children), sex (proportion of females), and geographic region (USA, EU, or Asia) were examined for a significant influence on the risk of obesity.

The Cochrane  $\chi^2$  test and the I<sup>2</sup> test were used to evaluate heterogeneity among studies, and a threshold value of  $p = 0.10$  was considered to be significant [16]. The possibility of publication bias was evaluated by creating a funnel plot of the effect size for each study versus the SE. Funnel plot asymmetry was assessed by the Begg and Egger tests. All statistical analyses were performed with Stata 11.0 software (StataCorp, College Station, TX). Results are expressed as the mean with 95% CI, unless otherwise indicated. Except for tests of heterogeneity, a  $P$  value of less than 0.05 was considered significant. All procedures were performed in accordance with the guideline for the meta-analysis of observational studies in epidemiology [17] and the PRISMA statement [18].

## Results

### Search Results

**Figure 1** shows a flow chart of study selection. We identified a total of 237 reports by the database searches. Of these, 219 reports were excluded after review of the title and abstract, leaving 18 for further evaluation. A further eight studies were excluded after full-text evaluation, chiefly because these studies did not

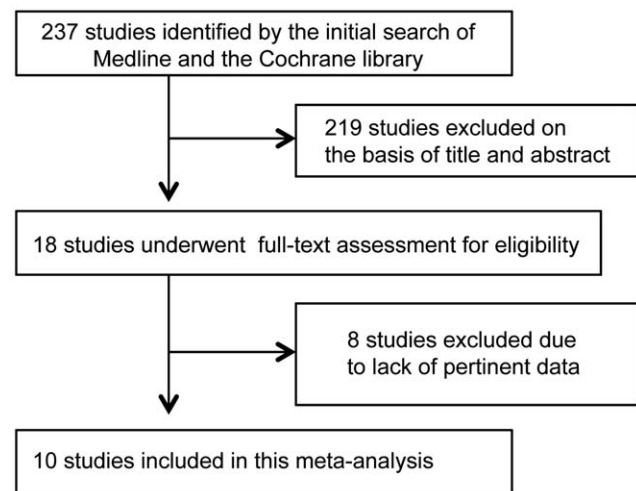

**Figure 1. Flow diagram of study selection.**

doi:10.1371/journal.pone.0042031.g001

contain pertinent data. A total of 10 studies [5–14] eventually fulfilled the inclusion criteria and were used in this meta-analysis.

### Study Characteristics

All 10 studies selected were cross-sectional studies and **Table 1** shows their characteristics. There was moderate heterogeneity of the country of origin, mean age, proportion of females, and mean BMI. The studies were published between 2005 and 2012. Seven studies [5,6,8,11–14] investigated adults and three [7,9,10] were performed on children. Four studies [6,11,12,14] were conducted in the EU, three [5,8,9] in the USA, and three [7,10,13] in Asia. The size of the study populations ranged from 56 to 540 subjects (mean: 261 subjects). The mean age, proportion of females, and mean BMI were generally in the range between 40–45 years for studies of adults (11–14 years for studies of children), 40–70%, and 24–28 kg/m<sup>2</sup>.

Among the 10 studies, eight reported [5,6,9–14] the BMI, seven [5–7,10,11,13,14] reported total cholesterol (TC) levels, seven [5,6,8–10,12,13] reported about obesity, six [5,6,10,11,13,14] reported triglyceride (TG) levels, five [6,10,11,13,14] reported high-density lipoprotein (HDL) levels, five [7,10,11,13,14] reported blood glucose (BG) levels, four [6,10,11,14] reported low-density lipoprotein (LDL) levels, four [6,7,10,13] reported systolic blood pressure (SBP), and four [7,9,10,13] reported waist circumference (WC). The definitions and methods of assessing obesity varied across the studies, with three studies [5,6,10] defining obesity as a BMI  $\geq 30$  kg/m<sup>2</sup>, one study [8] using a BMI  $> 29$  kg/m<sup>2</sup>, one [13] using a BMI  $\geq 25$  kg/m<sup>2</sup> (South Korea), and one [9] using a BMI  $\geq 95$ th percentile (children). In all studies, natural Ad36 infection was detected by measurement of neutralizing antibodies.

Atkinson [5] reported two independent studies performed in 502 adults and 28 sets of twins, respectively, in the same paper. The mean BMI of the 502 adults (38.0 kg/m<sup>2</sup>) was higher than in the other studies. Trovato [6,14] reported two studies that included patients with non-alcoholic fatty liver disease (NAFLD). The subjects of Broderick study [8] included military personnel on active duty.

### Association of Ad36 with BMI

Of 237 potentially relevant studies, 10 cross-sectional studies with 2,870 subjects conformed to the selection criteria. None of

**Table 1.** Summary of studies evaluating the association between Adenovirus 36 (Ad36) infection and obesity/metabolic markers in humans.

| First author, year  | Type of subject | Country                 | Parameters                                  | Assessment of obesity | Number of subjects | Mean age (yrs) | Female (%) | Mean BMI (kg/m <sup>2</sup> ) | Participants                                            | Prevalence of Ad36 infection |
|---------------------|-----------------|-------------------------|---------------------------------------------|-----------------------|--------------------|----------------|------------|-------------------------------|---------------------------------------------------------|------------------------------|
| Atkinson, 2005 (5)  | Adults          | USA                     | Obesity, BMI, TG, TC                        | BMI ≥ 30              | 502                | 40.9           | 78         | 38.0                          | 360 obese and 142 non-obese adults                      | Obese 30% Non-obese 11%      |
| Atkinson, 2005 (5)  | Adults          | USA                     | BMI, TG, TC                                 | NA                    | 56                 | NA             | 79         | 25.3                          | 28 sets of twins                                        | Overall 22%                  |
| Trovato, 2009 (6)   | Adults          | Italy                   | Obesity, BMI, TG, TC, LDL, HDL, SBP         | BMI > 30              | 203                | 45.9           | 64         | 27.7                          | 68 obese and 135 non-obese adults                       | Obese 65% Non-obese 33%      |
| Atkinson, 2010 (7)  | Children        | South Korea             | TC, WC, SBP, BG                             | NA                    | 84                 | 14.8           | 16         | NA                            | 83 obese or overweight children and one non-obese child | Overall 30%                  |
| Broderick, 2010 (8) | Adults          | USA                     | Obesity                                     | BMI > 29              | 293                | NA             | 30         | NA                            | 146 obese and 147 non-obese adults                      | Obese 34% Non-obese 39%      |
| Gabbert, 2010 (9)   | Children        | USA                     | Obesity, BMI, WC                            | BMI > 95th percentile | 124                | 13.4           | 44         | 27.9                          | 67 obese and 57 non-obese children                      | Obese 22% Non-obese 7%       |
| Na, 2010 (10)       | Children        | South Korea             | Obesity, BMI, TG, TC, WC, LDL, HDL, SBP, BG | BMI ≥ 30              | 318                | 11.7           | 42         | 24.1                          | 259 obese and 59 non-obese children                     | Obese 29% Non-obese 14%      |
| Trovato, 2010 (11)  | Adults          | Italy                   | BMI, TG, TC, LDL, HDL, BG                   | NA                    | 179                | 45.7           | 65         | 27.4                          | 65 NAFLD and 114 non-NAFLD adults                       | Obese 32% Non-NAFLD 46%      |
| Goossens, 2011 (12) | Adults          | Netherlands and Belgium | Obesity, BMI                                | NA                    | 509                | NA             | NA         | 26.8                          | 136 obese, 281 non-obese, and 92 BMI-unknown adults     | Obese 6% Non-obese 4%        |
| Na, 2012 (13)       | Adults          | South Korea             | Obesity, BMI, TG, TC, WC, HDL, SBP, BG      | BMI ≥ 25              | 540                | 44.3           | 50         | 24.0                          | 180 obese and 360 non-obese adults                      | Obese 30% Non-obese 36%      |
| Trovato, 2012 (14)  | Adults          | Italy                   | BMI, TG, TC, LDL, HDL, BG                   | NA                    | 62                 | 50             | 56         | 30.3                          | 62 NAFLD adults                                         | Overall 40%                  |

BMI, body mass index (calculated as weight in kilograms divided by height in meters squared); TG, triglycerides; TC, total cholesterol; LDL, low density lipoprotein; HDL, high density lipoprotein; BG, blood glucose; NAFLD, Non-alcoholic fatty liver disease; SBP, systolic blood pressure; WC, waist circumference; NA, not available;  
doi:10.1371/journal.pone.0042031.t001



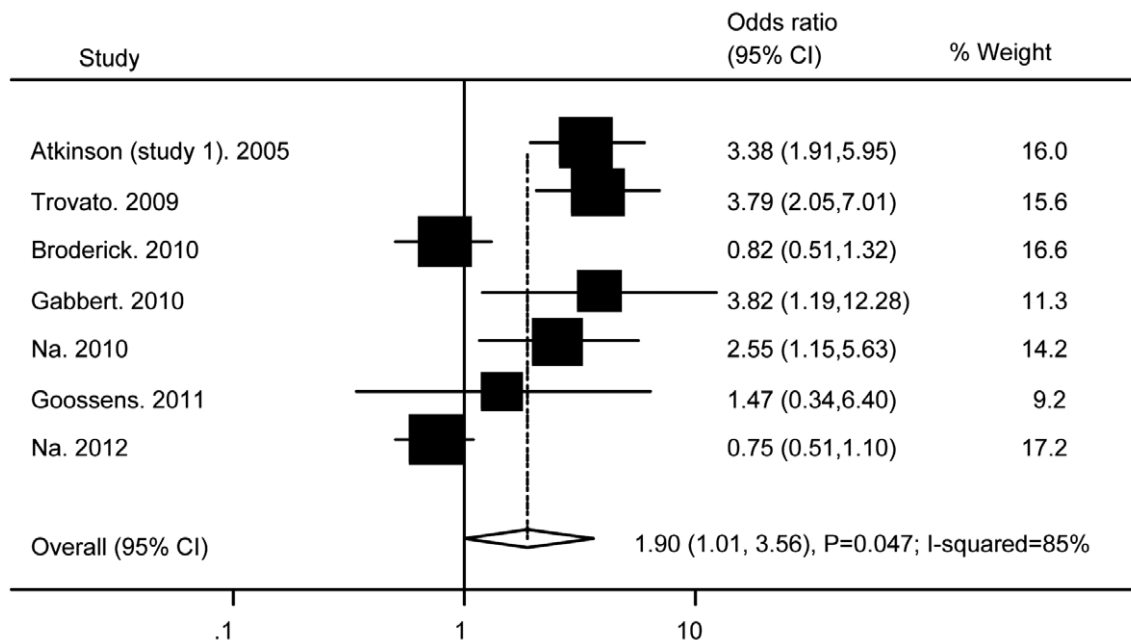

**Figure 3. Association of Ad36 with obesity.**  
doi:10.1371/journal.pone.0042031.g003

2012 [14] and excluded Trovato 2009 [6] and Trovato 2010 [11] gave a WMD of 2.92 (95% CI: 1.0 to 4.85,  $P = 0.003$ ).

In addition, the analysis that included Trovato 2010 [11] and excluded Trovato 2009 [6] and Trovato 2012 [14] gave a WMD of 3.04 (95% CI: 1.09 to 4.99,  $P = 0.002$ ).

Furthermore, the sensitivity analysis including Trovato 2009 [6] and excluding Trovato 2010 [11] and Trovato 2012 [14] yielded a WMD of 3.12 (95% CI 1.12 to 5.11,  $P = 0.002$ ).

All three analyses showed a significantly higher BMI in subjects with Ad36 infection than in those without infection. The results were also similar to that of our overall analysis (WMD: 3.19), which was done before conducting the sensitivity analyses.

No effect of obesity was detected by the primary analysis because obesity was only described in one report by Trovato [6].

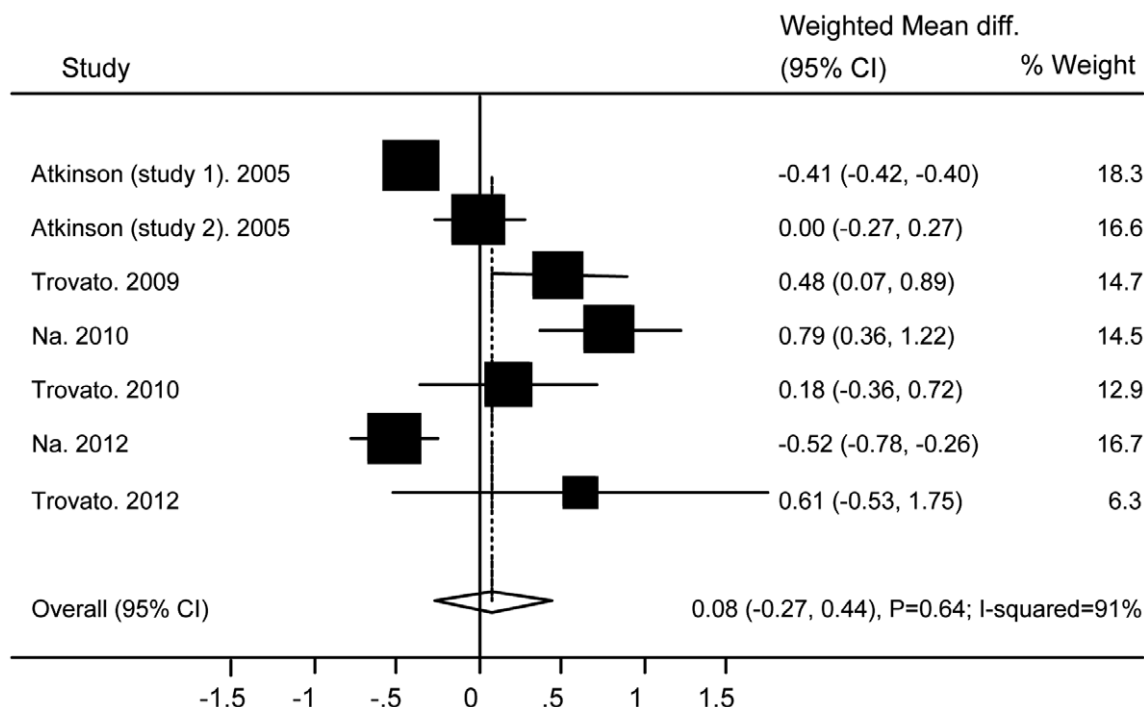

**Figure 4. Association of Ad36 with Triglyceride.**  
doi:10.1371/journal.pone.0042031.g004

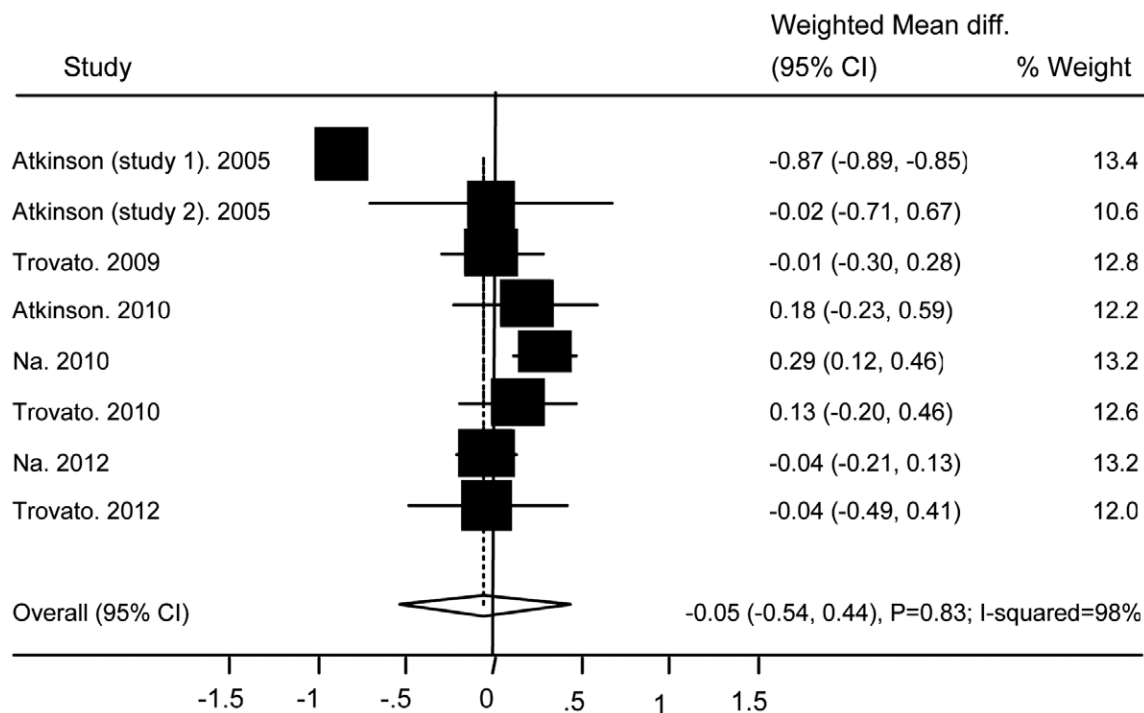

**Figure 5. Association of Ad36 with Total Cholesterol.**  
doi:10.1371/journal.pone.0042031.g005

Subsequently, we conducted sensitivity analyses of other metabolic markers reported in two or more of Trovato's papers, including TG, TC, HDL, BG, and LDL.

The results of these analyses showed that there were no significant differences between subjects with or without Ad 36 infection in relation to four metabolic markers (TG, TC, HDL, and BG) (all  $P > 0.05$ ), corresponding to the outcome of our primary analysis.

In the case of LDL, the sensitivity analysis that included Trovato 2012 [14] and excluded Trovato 2009 [6] and Trovato 2010 [11] gave a WMD of 0.26 (95% CI: 0.11 to 0.41,  $P = 0.001$ ), while the analysis including Trovato 2010 [11] and excluding Trovato 2009 [6] and Trovato 2012 [14] gave a WMD of 0.2 (95% CI: 0.03 to 0.36,  $P = 0.02$ ).

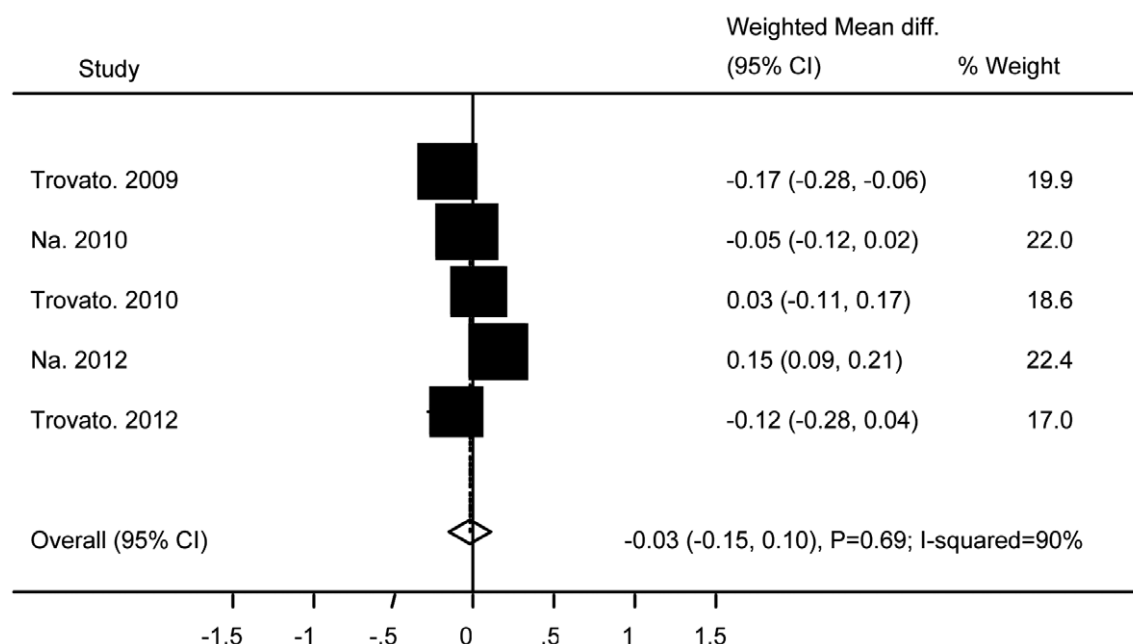

**Figure 6. Association of Ad36 with High Density Lipoprotein.**  
doi:10.1371/journal.pone.0042031.g006

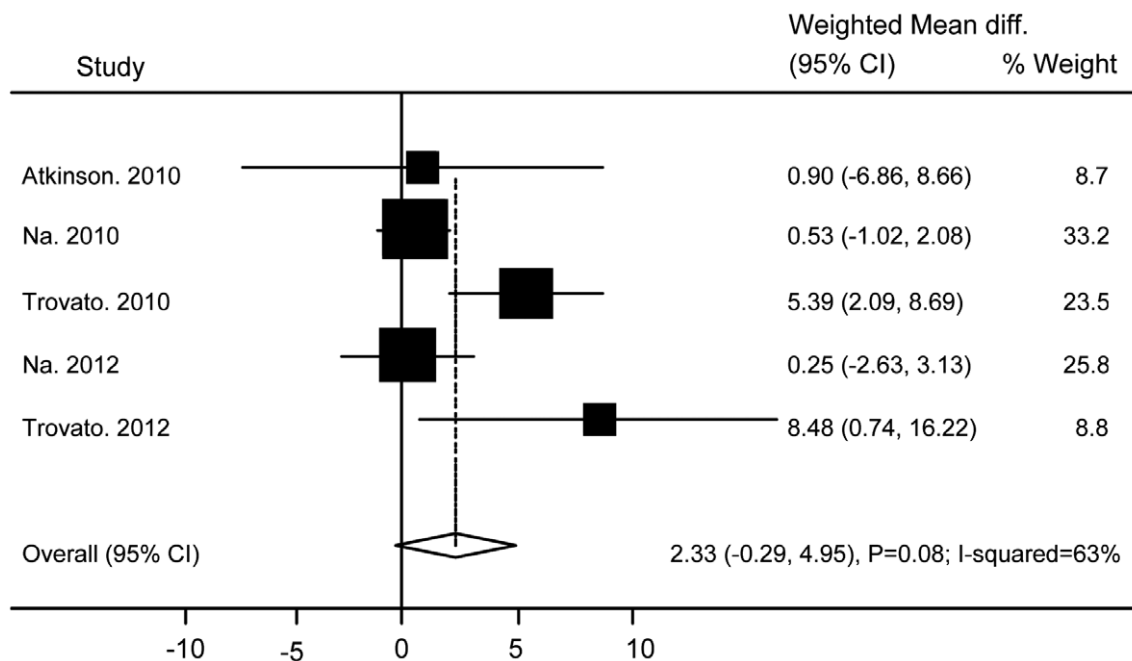

**Figure 7. Association of Ad36 with Blood Glucose.**  
doi:10.1371/journal.pone.0042031.g007

Moreover, the analysis that included Trovato 2009 [6] and excluding Trovato 2010 [11] and Trovato 2012 [14] yielded a WMD of 0.19 (95% CI: 0.02 to 0.36,  $P=0.03$ ).

These results for LDL were not significantly different to the result of our primary analysis performed prior to the sensitivity analyses (WMD: 0.19 [95% CI: 0.07 to 0.3]), although a very slight increase of WMD to 0.26 was observed.

## Discussion

This meta-analysis of 10 studies from around the world demonstrated that Ad36 infection was associated with the risk of obesity and weight gain (an estimated BMI increase of 3.19 kg/m<sup>2</sup>), but was not associated with abnormal metabolic markers including waist circumference. It suggests that Ad36 infection is more associated with accumulation of subcutaneous fat than that of visceral fat. Sensitivity analysis showed that our results were

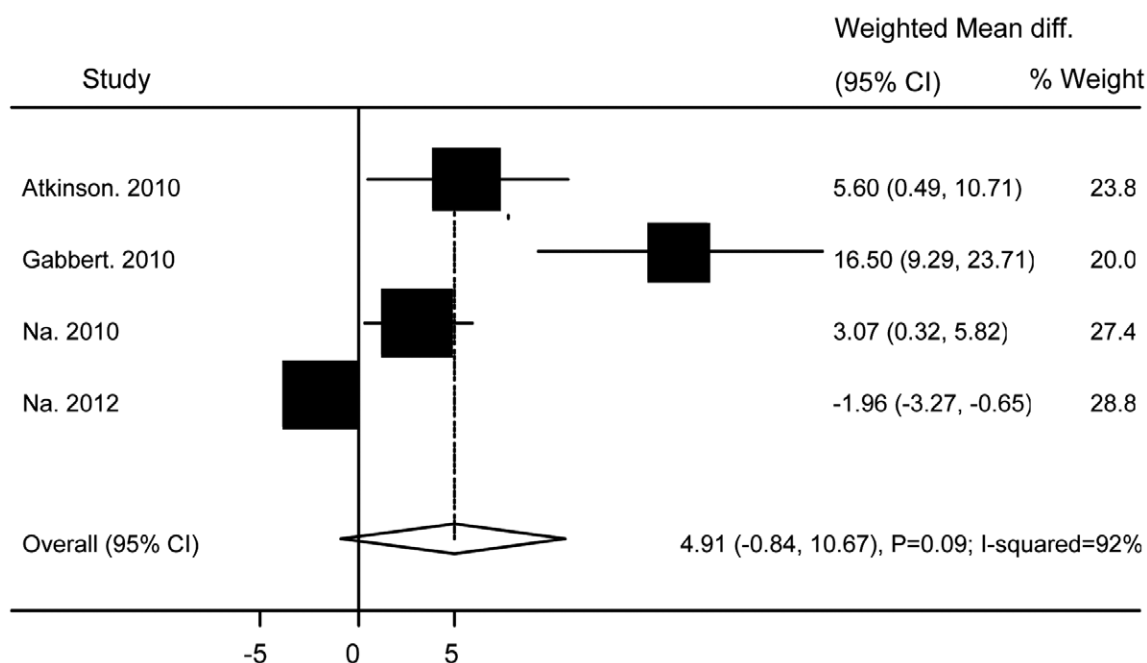

**Figure 8. Association of Ad36 with Waist Circumference.**  
doi:10.1371/journal.pone.0042031.g008

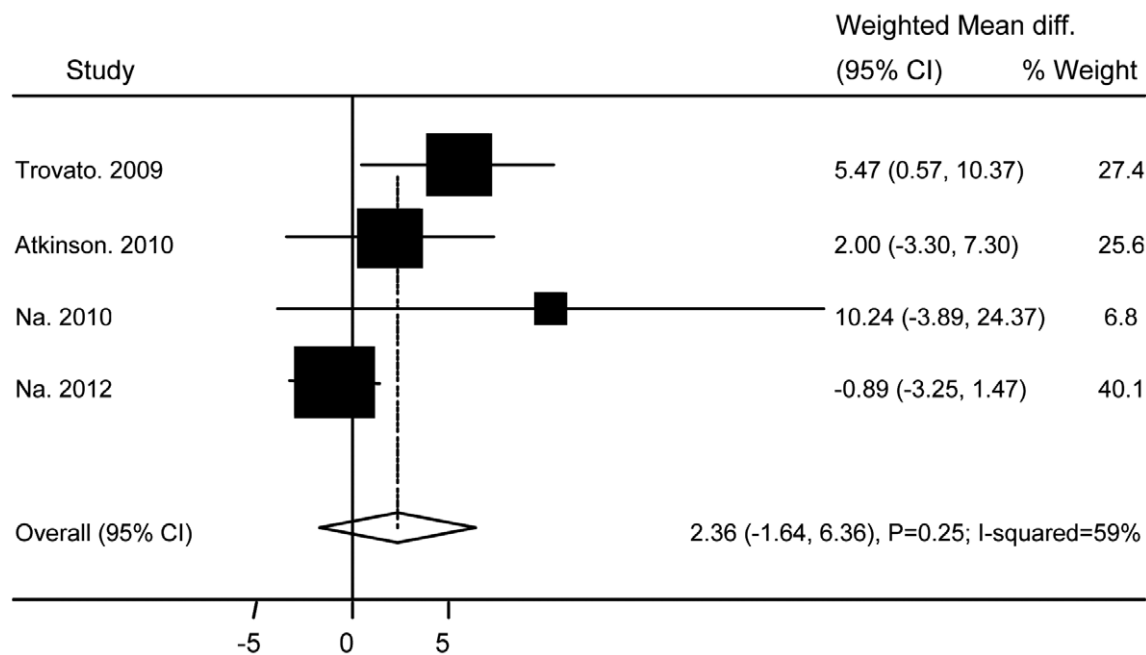

**Figure 9. Association of Ad36 with Systolic Blood Pressure.**  
doi:10.1371/journal.pone.0042031.g009

relatively robust, while meta-regression analysis indicated that the findings were not affected by differences of geographical region or age. When stratified analysis was done by dividing the subjects into two groups with a mean BMI  $\geq 27$  or BMI  $< 27$ , we found that infection with Adenovirus 36 was more closely related to obesity and weight gain in the heavier subjects compared with the lighter subjects. These results have certain implications for the management of obesity, especially in view of the recent exponential increase in its prevalence.

Most of the studies included in our meta-analysis were from a few groups of authors, so it was important to determine whether or not the subjects were from overlapping cohorts. Therefore, we investigated the studies of Atkinson et al., Na et al., and Trovato et al., which had to potential to include overlapping populations.

Atkinson et al. authored two papers about the relation between Ad36 and obesity (Atkinson 2005 [5] and Atkinson 2010 [7]). Atkinson 2005 [5] reported two observational studies in adults (study 1 involved 360 obese persons and 142 non-obese persons, while study 2 enrolled 28 sets of twins). These two studies were

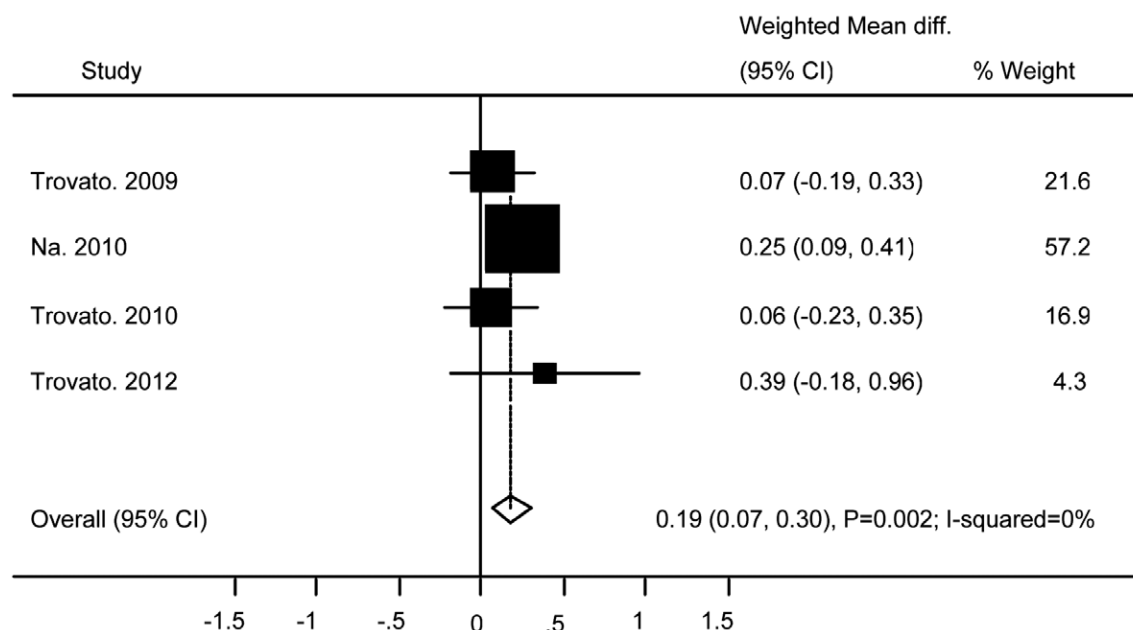

**Figure 10. Association of Ad36 with Low Density Lipoprotein.**  
doi:10.1371/journal.pone.0042031.g010

described by Atkinson as individually independent cohort studies conducted in different regions. In addition, we asked Atkinson about the study cohorts via e-mail, and confirmed that these studies were not conducted in the same cohort. On the other hand, Atkinson 2010 [7] reported a study conducted in children. Therefore, we judged that the three study populations reported in these two papers were all different cohorts.

Na et al. also authored two papers (Na 2010 [10] and Na 2012 [13]). Na 2010 [10] reported a study conducted in children, while Na 2012 [13] reported a study performed in adults. Accordingly, these studies were considered to be unlikely to involve the same cohort. In fact, we confirmed that these two studies were not conducted in the same cohort after contacting Na by e-mail.

Trovato et al. authored three papers about Ad36 and obesity (Trovato 2009 [6], Trovato 2010 [11], and Trovato 2012 [14]). These papers did not state that the subjects in each study were from the same cohort, but the studies were conducted at similar institutions. Also, both Trovato 2010 [11] and Trovato 2012 [14] described studies conducted in patients with NAFLD, so these two studies could have been conducted in the same cohort.

However, we performed sensitivity analyses that each included only one of the three studies of Trovato et al. and obtained similar results to those of the primary analysis for all metabolic markers, including obesity and BMI.

Although this meta-analysis included several reports by the same groups, most of the actual studies were conducted in independent cohorts. Also, the results of sensitivity analyses performed on Trovato's studies that could have included the same cohort showed that there was no influence on the outcome of our primary analysis. In other words, the results were consistent with our conclusion that Ad36 infection can significantly influence obesity and BMI, while it has little effect on other metabolic markers.

### Mechanism of the Relation between Ad36 and Obesity

Recent studies have shown that Ad36 infection increases adiposity in several animal models including marmosets, rats, mice, and chickens [19–22]. Ad36 infection significantly reduces serum cholesterol and triglyceride concentrations compared with those in uninfected controls. Interestingly, longitudinal studies performed in monkeys [21] have revealed an increase of body weight by about 15% and a 29% reduction of serum cholesterol after natural Ad36 infection.

Several mechanisms have been postulated to explain the association between Ad36 infection and obesity. Results of both *in vivo* and *in vitro* investigations have revealed that Ad36 infection accelerates the differentiation of preadipocytes into adipocytes and their proliferation in studies of 3T3-L1 cells and human preadipocytes [23–25]. Ad36 infection also raises the lipid content of fat cells by promoting the uptake of lipids and glucose, which increases cellular lipid levels by stimulation of *de novo* lipogenesis [25,26].

### Limitations

Our study had several limitations. First, we only reviewed English-language reports, which could cause selection bias. Second, substantial heterogeneity was observed among the studies

even after sensitivity analysis, suggesting that the different epidemiological characteristics (e.g., prevalence of Ad36 infection or different diagnostic criteria for obesity) of the patient populations contributed to this heterogeneity to some extent. This heterogeneity means that there was a wide range of plausible risk estimates, but we found no evidence to suggest that Ad36 infection is associated with a lower risk of obesity or a lower BMI. Although differences of the geographical region and age did not explain the heterogeneity in meta-regression analysis, it must be remembered that it is impossible to avoid the influence of measured (and unmeasured) confounders in observational studies.

Moreover, this meta-analysis only included case-control studies, so a causal relation with obesity could not be proven. Ideally, these results should be confirmed in prospective clinical trials, but ethical considerations preclude experimental infection of humans with candidate viruses to unequivocally define their contribution to obesity. Accordingly, we cannot rule out the possibility that the association of Ad36 with obesity results from greater susceptibility of obese individuals to infection compared with non-obese individuals [27]. However, a causal relationship between adenovirus 36 infection and obesity has been demonstrated in animals [19–22].

Third, there was limited information about the use of medications that may have contributed to obesity, such as insulin, sulfonylureas, and antipsychotics [28,29]. Cessation of smoking is also associated with weight gain [30]. Although uncommon, some obese patients have endocrine disorders such as Cushing's syndrome [31].

Even with such limitations, these observational studies provided useful evidence regarding the potential influence of Ad36 infection on obesity. Patients and physicians need to consider the possible increased risk of weight gain associated with Ad 36 infection.

### Conclusions

Ad36 infection was associated with the risk of obesity and weight gain, but was not associated with abnormal metabolic markers. The relationship between Ad36 infection and obesity should be assessed further by well-designed prospective studies to gain a better understanding of whether this virus plays a role in the etiology of human obesity.

### Supporting Information

**Checklist S1 PRISMA Checklist.**  
(DOC)

### Acknowledgments

We would like to express our gratitude to Atkinson RL and HN Na for providing additional information.

### Author Contributions

Conceived and designed the experiments: TY. Performed the experiments: TY KH. Analyzed the data: TY. Contributed reagents/materials/analysis tools: TY. Wrote the paper: TY. Reviewed/edited the manuscript: TY KH TK.

### References

1. WHO. Fact sheet on overweight and obesity. Available: <http://www.who.int/mediacentre/factsheets/fs311/en/>. Accessed 2012 Apr 24.
2. WHO (2000) Obesity: preventing and managing the global epidemic. Report of a WHO consultation. World Health Organ Tech Rep Ser 894: i–xii, 1–253.
3. Stevens J, Cai J, Pamuk ER, et al. (1998) The effect of age on the association between body-mass index and mortality. *N Engl J Med* 338: 1–7.
4. Calle EE, Thun MJ, Petrelli JM, et al. (1999) Body-mass index and mortality in a prospective cohort of U.S. adults. *N Engl J Med* 341: 1097–1105.

5. Atkinson RL, Dhurandhar NV, Allison DB, et al. (2005) Human adenovirus-36 is associated with increased body weight and paradoxical reduction of serum lipids. *Int J Obes (Lond)* 29: 281–286.
6. Trovato GM, Castro A, Tonzuso A, et al. (2009) Human obesity relationship with Ad36 adenovirus and insulin resistance. *Int J Obes (Lond)* 33: 1402–1409.
7. Atkinson RL, Lee I, Shin HJ, He J (2010) Human adenovirus-36 antibody status is associated with obesity in children. *Int J Pediatr Obes* 5(2): 157–160.
8. Broderick MP, Hansen CJ, Irvine M, et al. (2010) Adenovirus 36 seropositivity is strongly associated with race and gender, but not obesity, among US military personnel. *Int J Obes (Lond)* 34: 302–308.
9. Gabbert C, Donohue M, Arnold J, Schwimmer JB (2010) Adenovirus 36 and obesity in children and adolescents. *Pediatrics* 126: 721–726.
10. Na HN, Hong YM, Kim J, Kim HK, Jo I, et al. (2010) Association between human adenovirus-36 and lipid disorders in Korean schoolchildren. *Int J Obes (Lond)* 34: 89–93.
11. Trovato GM, Martinez GF, Garozzo A, et al. (2010) Ad36 adipogenic adenovirus in human non-alcoholic fatty liver disease. *Liver Int* 30: 184–190.
12. Goossens VJ, deJager SA, Grauls GE, et al. (2011) Lack of evidence for the role of human adenovirus-36 in obesity in a European cohort. *Obesity (Silver Spring)* 19: 220–221.
13. Na HN, Kim J, Lee HS, Shim KW, Kimm H, et al. (2012) Association of human adenovirus-36 in overweight Korean adults. *Int J Obes (Lond)* 36: 281–285.
14. Trovato GM, Martinez GF, Trovato FM, Pirri C, Pace P, et al. (2012) Adenovirus-36 Seropositivity Enhances Effects of Nutritional Intervention on Obesity, Bright Liver, and Insulin Resistance. *Dig Dis Sci* 57: 535–544.
15. von Elm E, Altman DG, Egger M, Pocock SJ, Gøtzsche PC, et al. (2008) The Strengthening the Reporting of Observational Studies in Epidemiology (STROBE) statement: guidelines for reporting observational studies. *J Clin Epidemiol* 61: 344–349.
16. Higgins JP, Thompson SG (2002) Quantifying heterogeneity in a meta-analysis. *Stat Med* 21: 1539–1558.
17. Stroup DF, Berlin JA, Morton SC, Olkin I, Williamson GD, et al. (2000) Meta-analysis of observational studies in epidemiology: a proposal for reporting. Meta-analysis Of Observational Studies in Epidemiology (MOOSE) group. *JAMA* 283: 2008–2012.
18. Liberati A, Altman DG, Tetzlaff J, Mulrow C, Gøtzsche PC, et al. (2009) The PRISMA statement for reporting systematic reviews and meta-analyses of studies that evaluate health care interventions: explanation and elaboration. *Ann Intern Med* 151: W65–94.
19. Dhurandhar NV, Israel BA, Kolesar JM, Mayhew GF, Cook ME, et al. (2000) Increased adiposity in animals due to a human virus. *Int J Obes Relat Metab Disord* 24: 989–996.
20. Dhurandhar NV, Israel BA, Kolesar JM, Mayhew G, Cook ME, et al. (2001) Transmissibility of adenovirus-induced adiposity in a chicken model. *Int J Obes Relat Metab Disord* 25: 990–996.
21. Dhurandhar NV, Whigham LD, Abbott DH, et al. (2002) Human adenovirus Ad-36 promotes weight gain in male rhesus and marmoset monkeys. *J Nutr* 132: 3155–3160.
22. Pasarica M, Shin AC, Yu M, et al. (2006) Human adenovirus 36 induces adiposity, increases insulin sensitivity, and alters hypothalamic monoamines in rats. *Obesity (Silver Spring)* 14: 1905–1913.
23. Pasarica M, Mashtalir N, McAllister EJ, et al. (2008) Adipogenic human adenovirus Ad-36 induces commitment, differentiation and lipid accumulation in human adipose-derived stem cells. *Stem Cells* 26: 969–978.
24. Rathod M, Rogers PM, Vangipuram SD, McAllister EJ, Dhurandhar NV (2009) Adipogenic cascade can be induced without adipogenic media by a human adenovirus. *Obesity (Silver Spring)* 17: 657–664.
25. Vangipuram SD, Yu M, Tian J, et al. (2007) Adipogenic human adenovirus-36 reduces leptin expression and secretion and increases glucose uptake by fat cells. *Int J Obes (Lond)* 31: 87–96.
26. Rogers PM, Mashtalir N, Rathod MA, et al. (2008) Metabolically favorable remodeling of human adipose tissue by human adenovirus Ad-36. *Diabetes* 57: 2321–2331.
27. Falagas ME, Kompoti M (2006) Obesity and infection. *Lancet Infect Dis* 6: 438–446.
28. Fernstrom MH (1989) Depression, antidepressants, and body weight change. *Ann N Y Acad Sci* 575: 31–9.
29. Leslie WS, Hankey CR, Lean ME (2007) Weight gain as an adverse effect of some commonly prescribed drugs: a systematic review. *QJM* 100: 395–404.
30. Filozof C, Fernández Pinilla MC, Fernández-Cruz A (2004) Smoking cessation and weight gain. *Obes Rev* 5: 95–103.
31. Howlett TA, Rees LH, Besser GM (1985) Cushing's syndrome. *Clin Endocrinol Metab* 14: 911–945.
